# Supplementary material for: Automatic, sequential power generation for prolonging the net lifetime of a miniature biofuel cell stack
Source: Royal Society of Chemistry journal article supplement (doi:10.1039/c004322b), 2010-01-01
Supplement: c004322b.pdf [file c004322b.pdf]

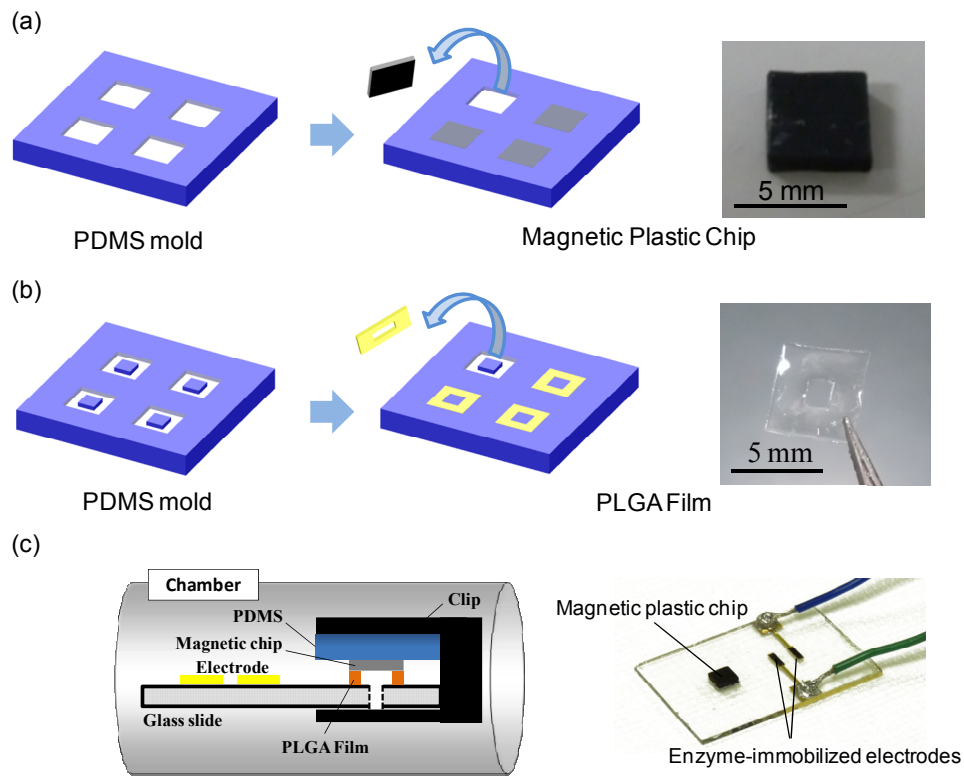

Supplementary Figure 1. Fabrication process and photographs of (a) magnetic plastic chip, (b) PLGA film and (c) the magnetic chip bonding to an enzyme-immobilized glass slide via a PLGA film.

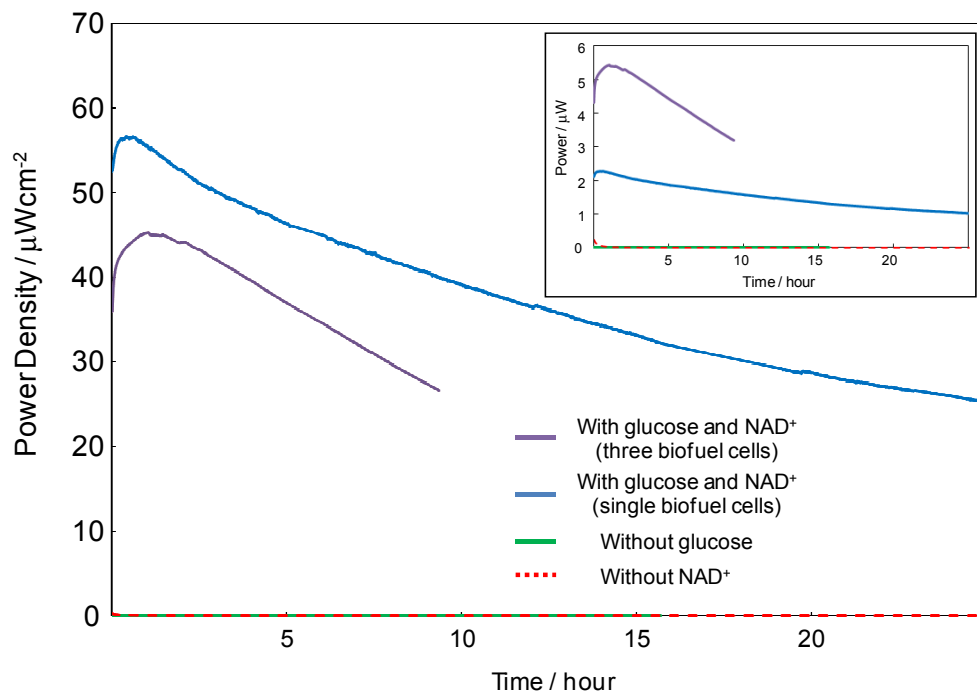

Supplementary Figure 2. An example of the time course of the power density of a single biofuel cell and tri-cells without the magnetic covers. The cell was working in the presence and absence of 50 mM glucose and/or 5 mM NAD<sup>+</sup>. The power is generated only in the presence of both glucose and NAD<sup>+</sup>. Inset is the time course of the power of a single biofuel cell and tri-cells without the magnetic covers.
